# Supplementary material
Source: ML conference proceedings conference paper supplement (https://openreview.net/forum?id=qBAED3u1XZ)
Supplement: supplementary_material [file attachment]

# VLATTACK: Multimodal Adversarial Attacks on Vision-Language Tasks via Pre-trained Models (Supplementary Materials)

Anonymous Author(s)

Affiliation

Address

email

## 1 A. Details of VL Models

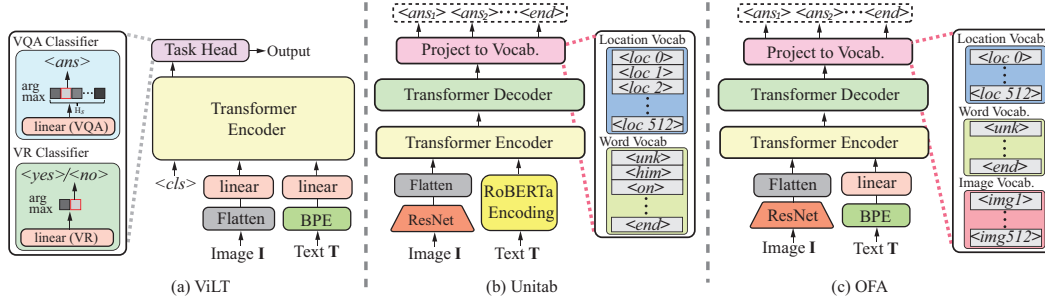

Figure 1: An illustration of ViLT, Unitab, and OFA model structures.

2 This section gives the details of ViLT, Unitab, and OFA models, and their structures are illustrated  
3 in Figure 1

- 4 • **ViLT.** We select ViLT [1] as the **encoder-only** VL model because of its succinct structure and  
5 prominent performance on multiple downstream tasks. Given an input image  $\mathbf{I} \in \mathbb{R}^{H \times W \times 3}$  and  
6 a sentence  $\mathbf{T}$ , ViLT yields  $M$  image tokens using a linear transformation on the flattened image  
7 patches, where each token is a 1D vector and  $M = \frac{HW}{P^2}$  for a given patch resolution  $(P, P)$ . Word  
8 tokens are encoded through a Byte-Pair Encoder (BPE) [2] and a word-vector linear projection.  
9 Then tokens of two modalities and a special learnable token  $\langle cls \rangle$  are concatenated. By attending  
10 visual and text tokens and a special token  $\langle cls \rangle$  in a Transformer encoder with twelve layers,  
11 the output feature from the  $\langle cls \rangle$  token is fed into a task-specific classification head for the final  
12 output. Taking the VQA task as an example, the VQA classifier adopts a linear layer to output a  
13 vector with  $H_s$  elements, where  $H_s$  is the number of all possible choices in the closed answer set  
14 of the VQA task. The final output is obtained through the element with the highest response in the  
15 vector.
- 16 • **Unitab.** Unitab adopts an **encoder-decoder** framework. It first embeds text  $\mathbf{T}$  via RoBERTa [3]  
17 and flats features after encoding image  $\mathbf{I}$  through ResNet [4]. The attached visual and text token  
18 features are then fed into a standard Transformer network [5] with six encoder layers and six  
19 decoder layers. Finally, the sequence predictions  $[\langle ans_1 \rangle, \langle ans_2 \rangle, \dots, \langle end \rangle]$  are obtained auto-  
20 regressively through a projection head. The network stops regressing when an end token  $\langle end \rangle$   
21 appears. For different tasks, the output tokens may come from different pre-defined vocabularies.  
22 Given the REC task as an example, four tokens  $[(\langle loc x_1 \rangle, \langle loc x_2 \rangle), (\langle loc x_3 \rangle, \langle loc x_4 \rangle)]$  will be  
23 selected from the location vocabulary, which forms the coordinate of a bounding box. As a result,  
24 these models can handle both text and grounding tasks.

Table 1: An illustration of all datasets and tasks evaluated in our paper.

| Datasets    | Task           | Task description          | Attack Model |        |      | Attack Modality |      |
|-------------|----------------|---------------------------|--------------|--------|------|-----------------|------|
|             |                |                           | OFA          | Unitab | ViLT | Image           | Text |
| VQAv2       | VQA            | Scene Understanding QA    | ✓            | ✓      | ✓    | ✓               | ✓    |
| SNLI-VE     | VE             | VL Entailment             | ✓            |        |      | ✓               | ✓    |
| RefCOCO     | REC            | Bounding Box Localization | ✓            | ✓      |      | ✓               | ✓    |
| RefCOCOg    | REC            | Bounding Box Localization | ✓            | ✓      |      | ✓               | ✓    |
| RefCOCO+    | REC            | Bounding Box Localization | ✓            | ✓      |      | ✓               | ✓    |
| NLVR2       | VR             | Image-Text Pairs Matching |              |        | ✓    | ✓               | ✓    |
| MSCOCO      | Captioning     | Image Captioning          | ✓            |        |      | ✓               |      |
| ImageNet-1K | Classification | Object Classification     | ✓            |        |      | ✓               |      |

- 25 • **OFA**. As shown in Figure 1 (c), OFA also adopts an **encoder-decoder** structure. Different from  
 26 Unitab, it adopts the BPE to encode text and extends the linguistic vocabulary by adding image  
 27 quantization tokens [6]  $\langle img \rangle$  for synthesis tasks. *Note that the main difference between OFA*  
 28 *and Unitab lies in their pre-training and fine-tuning strategies rather than the model struc-*  
 29 *ture*. For example, in the pre-training process, Unitab focuses on learning alignments between  
 30 predicted words and boxes through grounding tasks, while OFA captures more general represen-  
 31 tations through multi-task joint training that includes both single-modal and multi-modal tasks.  
 32 Overall, OFA outperforms Unitab in terms of performance improvement.

## 33 B. Dataset and Implementation

### 34 B.1 Tasks and Datasets

35 To verify the generalization ability of our proposed VLATTACK, we evaluate a wide array of popular  
 36 vision language tasks summarized in Table 1. Specifically, the selected tasks span from text under-  
 37 standing (visual reasoning, visual entailment, visual question answering) to image understanding  
 38 (image classification, captioning) and localization (referring expression comprehension).

39 For each dataset, we randomly select 5K **correctly predicted samples** in the corresponding valida-  
 40 tion dataset to evaluate the ASR performance. All validation datasets follow the same split settings  
 41 as adopted in the respective attack models. Because VQA is a multiclass classification task, we  
 42 select a correct prediction only if the prediction result is the same as the label with the highest VQA  
 43 score<sup>1</sup>, and regard the label as the ground truth in Eq. (1). In the REC task, a correct prediction is  
 44 considered when the Intersection-over-Union (IoU) score between the predicted and ground truth  
 45 bounding box is larger than 0.5. We adopt the same IoU threshold as in Unitab [7] and OFA [8].

### 46 B.2 Implementation Details

47 For the perturbation parameters of images, we follow the setting in the common transferable image  
 48 attacks [9, 10] and set the maximum perturbation  $\sigma_i$  of each pixel to 16/255 on all tasks except  
 49 REC. Considering that even a single coordinate change can affect the final grounding results to a  
 50 great extent, the  $\sigma_i$  of the REC task is 4/255 to better highlight the ASR differences among distinct  
 51 methods. The total iteration number  $N$  and step size are set to 40 and 0.01 by following the projected  
 52 gradient decent method [11], and  $N_s$  is 20. For the perturbation on the text, the semantic similarity  
 53 constraint  $\sigma_s$  is set to 0.95, and the number of maximum modified words is set to 1 by following  
 54 the previous text-attack work [12, 13] to ensure the semantic consistency and imperceptibility. All  
 55 experiments are conducted on a single GTX A6000 GPU. The analysis of parameter selection can  
 56 be found in Section B.3.

### 57 B.3 Parameter Sensitivity Analysis

58 We discuss the effect of different iteration numbers of  $N$  and  $N_s$  in VLATTACK. All experiments  
 59 are conducted on the VQAv2 dataset and the ViLT model. The total iteration number  $N$  is set from

<sup>1</sup>The VQA score calculates the percentage of the predicted answer that appears in 10 reference ground truth answers. More details can be found via <https://visualqa.org/evaluation.html>



10 to 80,  $N_s$  is set to  $\frac{N}{2}$ . As depicted in Figure 2(a), the ASR performance is dramatically improved by increasing  $N$  from 10 to 20 steps and then achieves the best result when  $N = 40$ .

We next investigate the impact of different initial iteration numbers  $N_s$ . We test  $N_s$  from 5 to 40, but the total iteration number  $N$  is fixed to 40. As shown in Figure 2(b), the ASR score reaches the summit when  $N_s$  is 5, and it is smoothly decreased by continually enlarging  $N_s$ . Considering that the smaller initial iteration number  $N_s$  increases the ratio of text perturbations, we set  $N_s$  as 20 to obtain the best trade-off between attack performance and the naturalness of generated adversarial samples in our experiments.

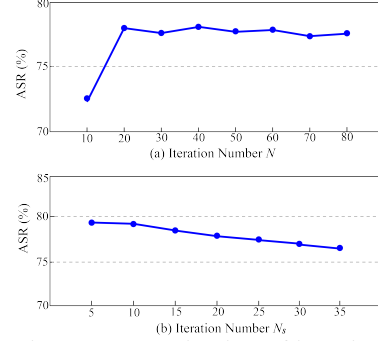

Figure 2: Investigation of iteration number  $N$  and  $N_s$ . (a) Various total iteration number  $N$ , where  $N_s$  is set to  $\frac{N}{2}$ . (b) Various initial iteration numbers  $N_s$ , where  $N$  is set to 40.

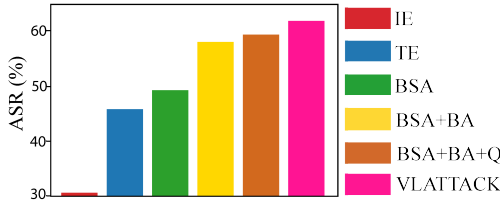

Figure 3: ViLT-VR.

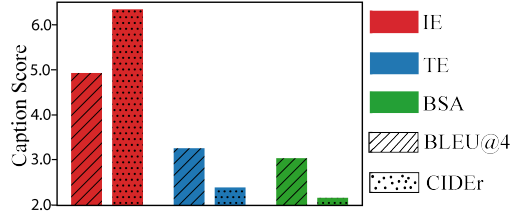

Figure 4: OFA-captioning.

Figure 3 shows the results of the ablation study on the VR task using the ViLT model. We can observe that only using the image encoder results in significantly low ASR. However, by combining it with the Transformer encoder (TE), BSA can achieve a high ASR. These results show the reasonableness of considering two encoders simultaneously when attacking the image modality. The result of BSA+BA demonstrates the usefulness of attacking the text modality. Although BSA+BA+Q outperforms other approaches, its performance is still lower than that of the proposed VLATTACK. This comparison proves that the proposed iterative cross-search attack (ICSA) strategy is effective for the multimodal attack again.

Figure 4 shows the results of the image captioning task using the OFA model. Because the image captioning task only accepts a fixed text prompt for prediction, we only perturb the image and report the results on IE, TE, and BSA. For this task, we report BLEU@4 and CIDEr scores. **The lower, the better.** We can have the same observations with other ablation studies, where attacking both encoders outperforms attacking a single encoder.

Figure 5 shows the results of the image classification task using the OFA model. Similar to the image captioning task, we only attack images. The evaluation metric for this task is ASR. **The higher, the better.** We can have the same observations with other ablation studies, where attacking both encoders outperforms attacking a single encoder.

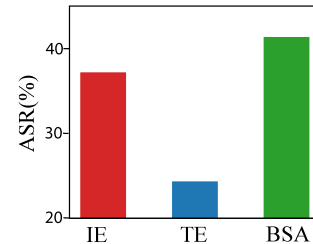

Figure 5: OFA-classification.

## D. Different Optimization Methods

VLATTACK can be easily adapted to various optimization methods in image attacks. To demonstrate the generalizability of our method, we replace the projected gradient decent [11] in VLATTACK with Momentum Iterative method (MI) [14] and Diverse Input attack (DI) [15] since they

Table 2: Combining VLATTACK with different gradient-based image attack schemes.

| Method          | ViLT         |              | Unitab       |              |              |              |
|-----------------|--------------|--------------|--------------|--------------|--------------|--------------|
|                 | VQAv2        | NLVR2        | VQAv2        | RefCOCO      | RefCOCO+     | RefCOCOg     |
| $BSA_{MI}$      | 65.40        | 52.32        | 50.38        | 86.00        | 89.20        | 87.39        |
| $VLATTACK_{MI}$ | <b>78.77</b> | <b>67.16</b> | <b>63.02</b> | <b>92.46</b> | <b>93.10</b> | <b>94.34</b> |
| $BSA_{DI}$      | 65.94        | 52.30        | 42.74        | 90.30        | 91.56        | 91.00        |
| $VLATTACK_{DI}$ | <b>78.07</b> | <b>67.50</b> | <b>61.22</b> | <b>93.98</b> | <b>94.04</b> | <b>94.76</b> |

have shown better performance than traditional iterative attacks [11, 16]. The replaced methods are denoted by  $BSA_{MI}$ , and  $VLATTACK_{MI}$  using MI,  $BSA_{DI}$  and  $VLATTACK_{DI}$  using DI, respectively. Experiments are developed on ViLT and Unitab. Results are shown in Table 2. Using MI and DI optimizations,  $BSA_{MI}$  and  $BSA_{DI}$  still outperform all baselines displayed in Table 1 in the main manuscript. Also,  $VLATTACK_{MI}$  and  $VLATTACK_{DI}$  outperform the image attack method  $BSA_{MI}$  and  $BSA_{DI}$  with an average ASR improvement of 9.70% and 9.29% among all datasets. The gain of performance demonstrates that the proposed VLATTACK can be further improved by combining with stronger gradient-based optimization schemes.

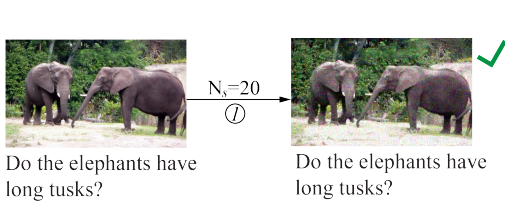

Figure 6: An adversarial image from BSA.

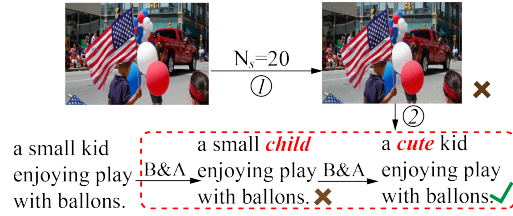

Figure 7: An adversarial sentence from text attack.

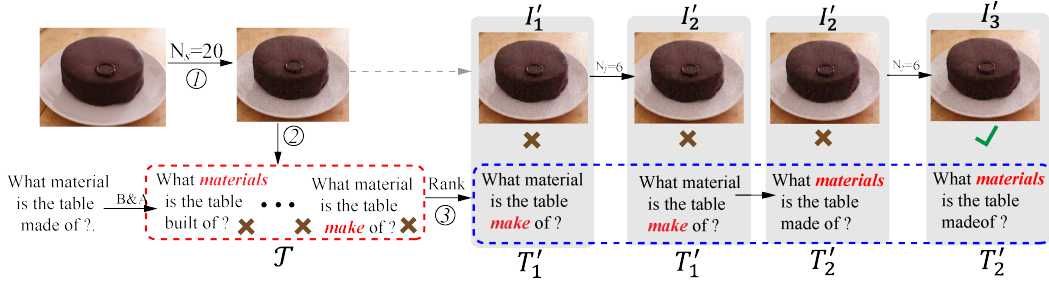

Figure 8: An adversarial image-text pair from multi-modal attack.

## E. Case Study

### E.1 How does VLATTACK generate adversarial samples?

The proposed VLATTACK aims to attack multimodal VL tasks starting by attacking single modalities. If they are failed, VLATTACK uses the proposed interactive cross-search attack (ICSA) strategy to generate adversarial samples. In this experiment, we display the generated adversarial cases from different attack steps, including the image modality in Figure 6, the text modality in Figure 7, and the multimodal attack in Figure 8.

**Single-modal Attacks (Section 4.1).** VLATTACK first perturbs the image modality using the proposed BSA and only outputs the adversarial image if the attack is successful (Algorithm 1 lines 1-5). As shown in Figure 6, only attacking the image modality, VLATTACK can generate a successful adversarial sample to fool the downstream task. Then, VLATTACK will stop. Otherwise, it will perturb the text through BERT-Attack (B&A) and use the clean image as the input, which is illustrated in Figure 7 (Algorithm 1, lines 6-15). During the text attack, B&A will generate multiple candidates by replacing the synonyms of a word. Since the length of text sentences is very short in

the VL datasets, we only replace one word each time. From Figure 7, we can observe that B&A first replaces “kid” with its synonym “child”, but this is not an adversarial sample. B&A then moves to the next word “small” and uses its synonym “cute” as the perturbation. By querying the black-box downstream task model, VLATTACK succeeds, and the algorithm will stop.

**Multimodal Attack (Section 4.2).** If the single-modal attack fails, VLATTACK moves to the multimodal attack by iteratively cross-updating image and text perturbations, where image perturbations are added through BSA, and text perturbations are added according to the semantic similarity. The cross-updating process is repeated until an adversarial image-text pair is found (Algorithm 1, lines 16-24). Figure 8 shows an example. In Step ①, VLATTACK fails to attack the image modality and outputs a perturbed image denoted as  $\mathbf{I}'_1$ . In Step ②, VLATTACK also fails to attack the text modality and outputs a list of text perturbations  $\mathcal{T}$ . VLATTACK has to use the multimodal attack to generate adversarial samples in Step ③. It first ranks the text perturbations in  $\mathcal{T}$  according to the semantic similarity between the original text and each perturbation. The ranked list is denoted as  $\{\hat{\mathbf{T}}'_1, \dots, \hat{\mathbf{T}}'_K\}$ . Then it equally allocates the iteration number of the image attack to generate the image perturbations iteratively. In Figure 8, this number is 6, which means we run BSA with the budget 6 to generate a new image perturbation.

VLATTACK takes the pair  $(\mathbf{I}'_1, \hat{\mathbf{T}}'_1)$  as the input to query the black-box downstream model, where  $\hat{\mathbf{T}}'_1 = \text{“What material is the table made of?”}$ . If this pair is not an adversarial sample, then the proposed ICSA will adopt BSA to generate the new image perturbation  $\mathbf{I}'_2$ . The new pair  $(\mathbf{I}'_2, \hat{\mathbf{T}}'_1)$  will be checked again. If it is still not an adversarial sample, VLATTACK will use the next text perturbation  $\hat{\mathbf{T}}'_2 = \text{“What materials is the table made of?”}$  and the newly generated image perturbation  $\mathbf{I}'_2$  as the input and repeat the previous steps until finding a successful adversarial sample or using up all  $K$  text perturbations in  $\mathcal{T}$ . VLATTACK employs a systematic strategy for adversarial attacks on VL models, sequentially targeting single-modal and multimodal perturbations to achieve successful adversarial attacks. *Note that we miss one line “if  $S(\mathbf{I}'_{k+1}, \mathbf{T}'_k) \neq y$  then return  $(\mathbf{I}'_{k+1}, \mathbf{T}'_k)$ ” between Lines 22 and 23 in Algorithm 1 of the main manuscript.*

## E.2 Case Study on Different Tasks

We also provide additional qualitative results from Figure 9 to Figure 14 for experiments on all six tasks. For better visualization, we display the adversarial and clean samples side by side in a single column. By adding pixel and word perturbations, the fidelity of all samples is still preserved, but predictions are dramatically changed. For instance, in the image captioning task of Figure 13, all generated captions show no correlation with the input images. Some texts may even include replacement Unicode characters, such as “\ufffd”, resulting in incomplete sentence structures.

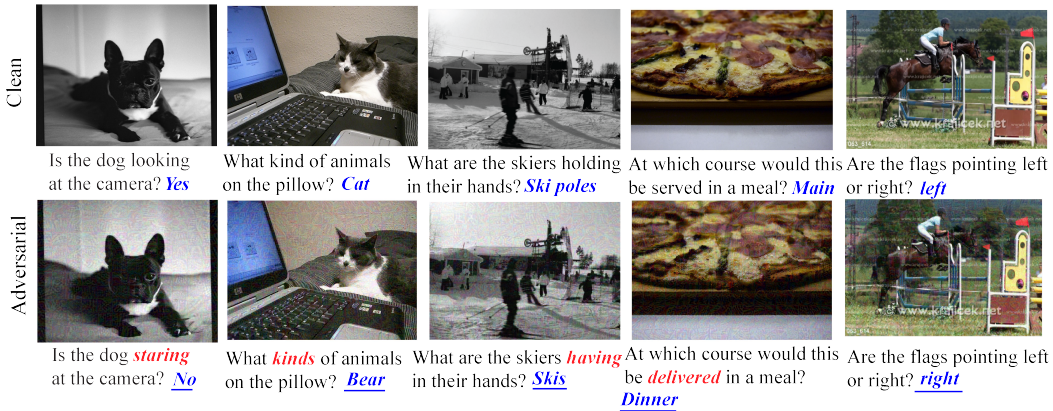

Figure 9: Additional quantitative results on visual question answering (VQA).

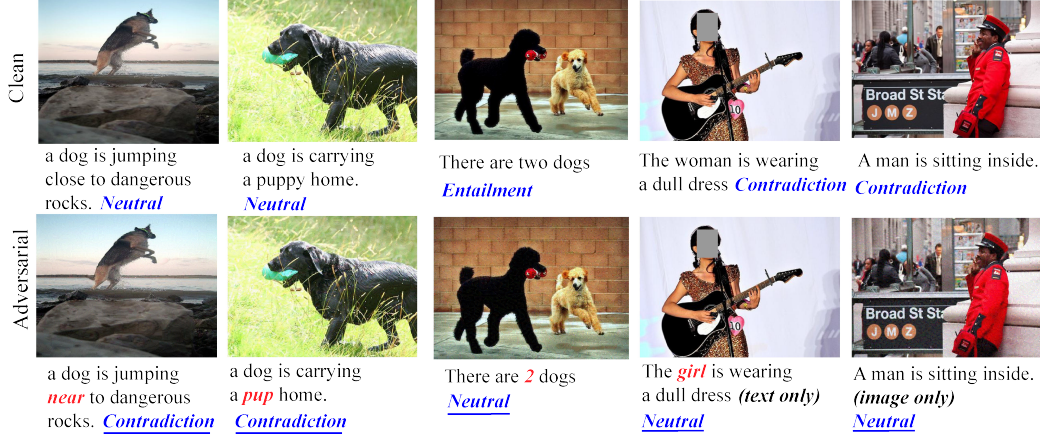

Figure 10: Additional quantitative results on visual entailment (VE).

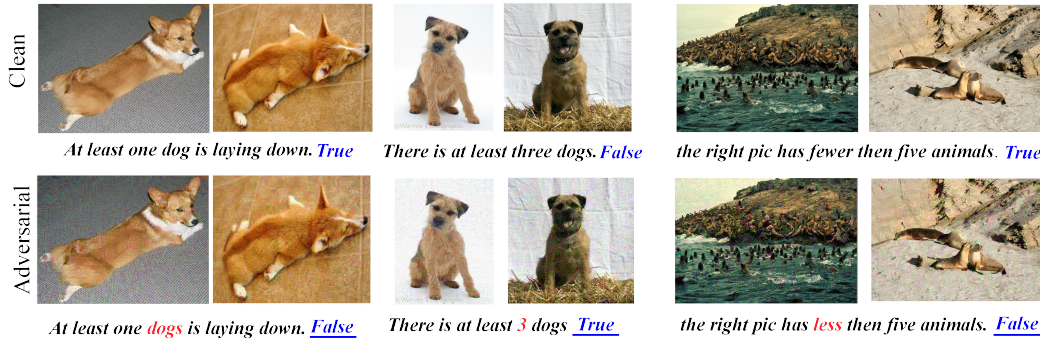

Figure 11: Additional quantitative results on visual reasoning (VR).

## F. Limitations

The limitations of our work can be summarized from the following two aspects. On the one hand, in our current model design, for the text modality, we directly apply the existing model instead of developing a new one. Therefore, there is no performance improvement on tasks that only accepts texts as input, such as text-to-image synthesis. On the other hand, our research problem is formulated by assuming the pre-trained and downstream models share similar structures. The adversarial transferability between different pre-trained and fine-tuned models is worth exploring, which we left to our future work.

## G. Broad Impacts

Our research reveals substantial vulnerabilities in vision-language (VL) pretrained models, underlining the importance of adversarial robustness cross pre-trained and fine-tuned models. By exposing these vulnerabilities through the VLATTACK strategy, we offer inspiration for developing more robust models. Furthermore, our findings underscore the ethical considerations of using VL models in real-world applications, especially those dealing with sensitive information and big data. Overall, our work emphasizes the necessity of balancing performance and robustness in VL models, with implications extending across computer vision, natural language processing, and broader artificial intelligence applications.

## References

- [1] Wonjae Kim, Bokyung Son, and Ildoo Kim. Vilt: Vision-and-language transformer without convolution or region supervision. In *ICML*, volume 139 of *Proceedings of Machine Learning*



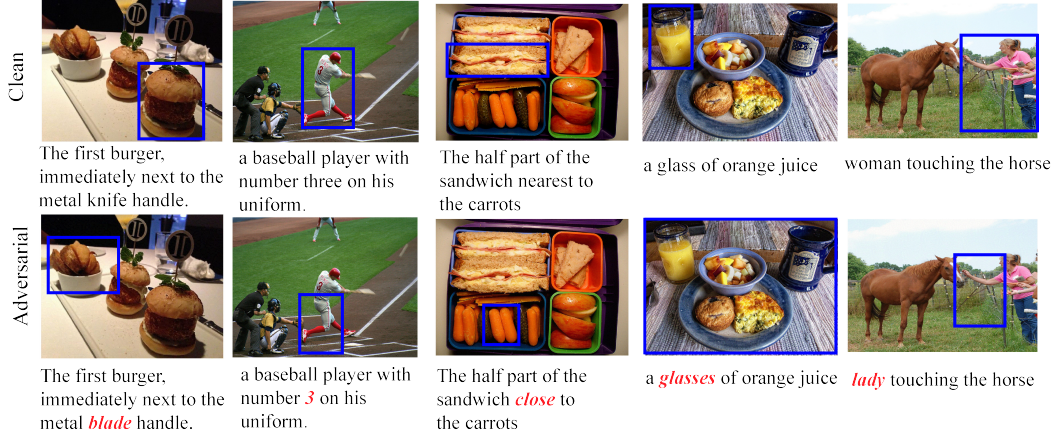

Figure 12: Additional quantitative results on referring expression comprehension (REC).

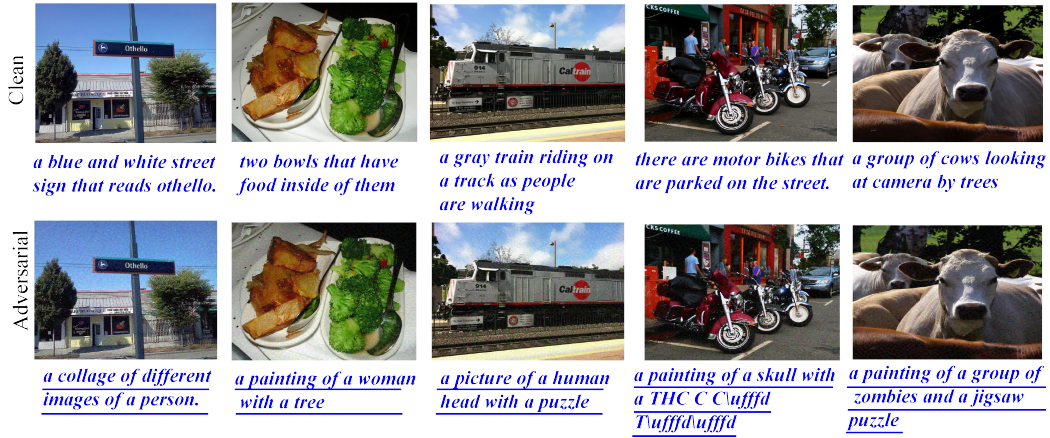

Figure 13: Additional quantitative results on the image captioning task.

- 175 *Research*, pages 5583–5594. PMLR, 2021.
- 176 [2] Rico Sennrich, Barry Haddow, and Alexandra Birch. Neural machine translation of rare words  
177 with subword units. In *ACL (1)*. The Association for Computer Linguistics, 2016.
- 178 [3] Yinhan Liu, Myle Ott, Naman Goyal, Jingfei Du, Mandar Joshi, Danqi Chen, Omer Levy,  
179 Mike Lewis, Luke Zettlemoyer, and Veselin Stoyanov. Roberta: A robustly optimized BERT  
180 pretraining approach. *CoRR*, abs/1907.11692, 2019.
- 181 [4] Kaiming He, Xiangyu Zhang, Shaoqing Ren, and Jian Sun. Deep residual learning for image  
182 recognition. In *CVPR*, pages 770–778. IEEE Computer Society, 2016.
- 183 [5] Ashish Vaswani, Noam Shazeer, Niki Parmar, Jakob Uszkoreit, Llion Jones, Aidan N. Gomez,  
184 Lukasz Kaiser, and Illia Polosukhin. Attention is all you need. *CoRR*, abs/1706.03762, 2017.
- 185 [6] Patrick Esser, Robin Rombach, and Björn Ommer. Taming transformers for high-resolution  
186 image synthesis. In *CVPR*, pages 12873–12883. Computer Vision Foundation / IEEE, 2021.
- 187 [7] Zhengyuan Yang, Zhe Gan, Jianfeng Wang, Xiaowei Hu, Faisal Ahmed, Zicheng Liu, Yumao  
188 Lu, and Lijuan Wang. Unitab: Unifying text and box outputs for grounded vision-language  
189 modeling. In *ECCV (36)*, volume 13696 of *Lecture Notes in Computer Science*, pages 521–  
190 539. Springer, 2022.
- 191 [8] Peng Wang, An Yang, Rui Men, Junyang Lin, Shuai Bai, Zhikang Li, Jianxin Ma, Chang Zhou,  
192 Jingren Zhou, and Hongxia Yang. OFA: unifying architectures, tasks, and modalities through  
193 a simple sequence-to-sequence learning framework. In *ICML*, volume 162 of *Proceedings of*  
194 *Machine Learning Research*, pages 23318–23340. PMLR, 2022.

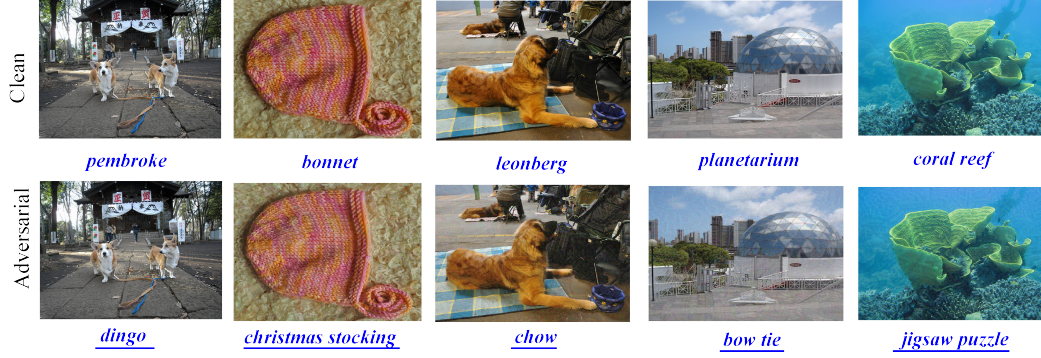

Figure 14: Additional quantitative results on the image classification task.

- 195 [9] Dongxian Wu, Yisen Wang, Shu-Tao Xia, James Bailey, and Xingjun Ma. Skip connections  
196 matter: On the transferability of adversarial examples generated with resnets. In *ICLR*. Open-  
197 Review.net, 2020.
- 198 [10] Zhipeng Wei, Jingjing Chen, Micah Goldblum, Zuxuan Wu, Tom Goldstein, and Yu-Gang  
199 Jiang. Towards transferable adversarial attacks on vision transformers. In *AAAI*, pages 2668–  
200 2676. AAAI Press, 2022.
- 201 [11] Aleksander Madry, Aleksandar Makelov, Ludwig Schmidt, Dimitris Tsipras, and Adrian  
202 Vladu. Towards deep learning models resistant to adversarial attacks. In *ICLR (Poster)*. Open-  
203 Review.net, 2018.
- 204 [12] Lei Xu, Alfredo Cuesta-Infante, Laure Berti-Équille, and Kalyan Veeramachaneni. R&R:  
205 Metric-guided adversarial sentence generation. In *AACL/IJCNLP (Findings)*, pages 438–452.  
206 Association for Computational Linguistics, 2022.
- 207 [13] Jiaming Zhang, Qi Yi, and Jitao Sang. Towards adversarial attack on vision-language pre-  
208 training models. In *ACM Multimedia*, pages 5005–5013. ACM, 2022.
- 209 [14] Jiafeng Wang, Zhaoyu Chen, Kaixun Jiang, Dingkan Yang, Lingyi Hong, Yan Wang, and  
210 Wenqiang Zhang. Boosting the transferability of adversarial attacks with global momentum  
211 initialization. *CoRR*, abs/2211.11236, 2022.
- 212 [15] Cihang Xie, Zhishuai Zhang, Yuyin Zhou, Song Bai, Jianyu Wang, Zhou Ren, and Alan L.  
213 Yuille. Improving transferability of adversarial examples with input diversity. In *CVPR*, pages  
214 2730–2739. Computer Vision Foundation / IEEE, 2019.
- 215 [16] Alexey Kurakin, Ian J. Goodfellow, and Samy Bengio. Adversarial machine learning at scale.  
216 In *ICLR (Poster)*. OpenReview.net, 2017.
